# Supplementary material
Source: PubMed Central journal article supplement (PMC1635460)
Supplement: rspb20063621s02.pdf [file rspb20063621s02.pdf]

Taxonomy and reference of the samples used. (Accession numbers of the amplified fragment, when obtained, are indicated. Accession numbers in bold were used to perform the test of evolution of *ace-2* sequences (see text).)

| infraorder                  | family                             | species                                       | reference                                          | accession<br><i>ace-2</i> | accession<br><i>ace-1</i> |
|-----------------------------|------------------------------------|-----------------------------------------------|----------------------------------------------------|---------------------------|---------------------------|
| Culicomorpha                | Culicidae                          | <i>Culex annulirostris</i> Skuse              | F. Renaud, personal communication                  | <b>AJ868294</b>           | AJ865835                  |
|                             | Chironomidae                       | unknown                                       | this study <sup>a</sup>                            | <b>AJ868295</b>           | AJ866990                  |
|                             | Simuliidae                         | <i>Simulium ornatum</i> Meigen                | this study <sup>a</sup>                            | —                         | AJ865836                  |
|                             | Ceratopogonidae                    | <i>Culicoides circumscriptus</i> Kieffer      | J. C. Delécolle, personal communication            | AJ868296                  | AJ865837                  |
|                             | Ceratopogonidae                    | <i>Culicoides salinarius</i> Kieffer          | J. C. Delécolle, personal communication            | AJ868297                  | AJ865838                  |
|                             | Ceratopogonidae                    | <i>Culicoides vexans</i> Staeger              | J. C. Delécolle, personal communication            | AJ868298                  | AJ865850                  |
|                             | Ceratopogonidae                    | <i>Culicoides riethi</i> Kieffer              | J. C. Delécolle, personal communication            | AJ868299                  | AJ865839                  |
| Ceratopogonidae             | <i>Culicoides newsteadi</i> Austen | J. C. Delécolle, personal communication       | AJ868300                                           | AJ865851                  |                           |
| Bibionomorpha               | Bibionidae                         | <i>Dilophus</i> sp.                           | this study <sup>a</sup>                            | AM159185                  | AJ865851                  |
|                             | Mycetophilidae                     | <i>Rymosia</i> sp1                            | this study <sup>a</sup>                            | AJ868301                  | —                         |
|                             | Mycetophilidae                     | <i>Rymosia</i> sp2                            | this study <sup>a</sup>                            | AJ868302                  | —                         |
|                             | Mycetophilidae                     | unknown                                       | this study <sup>a</sup>                            | —                         | AJ865855                  |
|                             | Keroplastidae                      | unknown                                       | this study <sup>a</sup>                            | AM159188                  | AJ865855                  |
| Psychodomorpha              | Sciaridae                          | <i>Sciara</i> sp.                             | this study <sup>a</sup>                            | AJ865831                  | —                         |
|                             | Psychodidae                        | unknown                                       | this study <sup>a</sup>                            | <b>AJ868303</b>           | AJ865852                  |
|                             | Phlebotomidae                      | <i>Phlebotomus perniciosus</i> Newstead       | this study <sup>a</sup>                            | AJ868305                  | AJ865853                  |
| Tipulomorpha                | Scatopsidae                        | <i>Apiloscatopse</i> sp.                      | this study <sup>a</sup>                            | <b>AJ868305</b>           | AJ865850                  |
|                             | Tipulidae                          | <i>Tipula</i> sp.                             | this study <sup>a</sup>                            | <b>AJ865830</b>           | AJ865855                  |
| Stratiomyomorpha            | Stratiomyidae                      | <i>Pachygaster atra</i> (Panzer)              | this study <sup>a</sup>                            | <b>AJ868306</b>           | —                         |
|                             | Stratiomyidae                      | <i>Chorisops tunisiae</i> (Becker)            | this study <sup>a</sup>                            | AM159186                  | AJ865858                  |
| Tabanomorpha                | Tabanidae                          | <i>Tabanus bromius</i> Linnaeus               | this study <sup>a</sup>                            | —                         | AJ865856                  |
| Asilomorpha                 | Scenopinidae                       | <i>Scenopinus fenestralis</i> (Linnaeus)      | this study <sup>a</sup>                            | AJ868307                  | AJ865857                  |
|                             | Bombyliidae                        | <i>Hemipenthes morio</i> (Linnaeus)           | this study <sup>a</sup>                            | AM159189                  | AJ865859                  |
|                             | Empididae                          | <i>Empis</i> sp.                              | this study <sup>a</sup>                            | AM159187                  | AJ865852                  |
|                             | Hybotidae                          | <i>Hybos femoratus</i> (Müller)               | this study <sup>a</sup>                            | AM159192                  | AJ865853                  |
|                             | Lonchopteridae                     | <i>Lonchoptera lutea</i> Panzer               | this study <sup>a</sup>                            | <b>AJ868308</b>           | —                         |
| Aschiza                     | Syrphidae                          | <i>Eristalis tenax</i> (Linnaeus)             | this study <sup>a</sup>                            | <b>AJ868309</b>           | —                         |
|                             | Pipunculidae                       | unknown                                       | this study <sup>a</sup>                            | AJ868310                  | —                         |
|                             | Conopidae                          | <i>Thecophora pusilla</i> (Meigen)            | this study <sup>a</sup>                            | AJ868311                  | —                         |
| Schizophora<br>acalyptratae | Psilidae                           | <i>Chamaepsila rosae</i> (Fabricius)          | S. Gouinguéné, personal communication <sup>b</sup> | AJ868312                  | —                         |
|                             | Diopsidae                          | <i>Diasemopsis signata</i> (Dalman)           | A. Pomiankowski, personal communication            | AJ868313                  | —                         |
|                             | Diopsidae                          | <i>Cyrtodiopsis dalmanii</i> (Wiedemann)      | A. Pomiankowski, personal communication            | AJ868315                  | —                         |
|                             | Diopsidae                          | <i>Sphyracephala beccarii</i> (Rondani)       | A. Pomiankowski, personal communication            | AJ868315                  | —                         |
|                             | Lonchaeidae                        | <i>Lonchaea</i> sp.                           | this study <sup>a</sup>                            | AJ868316                  | —                         |
|                             | Otitidae                           | <i>Dorycera graminum</i> (Fabricius)          | this study <sup>a</sup>                            | AM159190                  | —                         |
|                             | Platystomatidae                    | <i>Platystoma lugubre</i> (Robineau-Desvoidy) | this study <sup>a</sup>                            | AM159191                  | —                         |

(Continued.)

| infraorder                 | family        | species                                      | reference                                          | accession<br><i>ace-2</i> | accession<br><i>ace-1</i> |
|----------------------------|---------------|----------------------------------------------|----------------------------------------------------|---------------------------|---------------------------|
|                            | Tephritidae   | <i>Bactrocera oleae</i> (Gmelin)             | C. Caceres, personal communication <sup>c</sup>    | Q8MVZ5 <sup>d</sup>       | —                         |
|                            | Opomyzidae    | <i>Geomyza</i> sp.                           | this study <sup>a</sup>                            | AJ868317                  | —                         |
|                            | Agromyzidae   | <i>Liriomyza trifolii</i> (Burgess)          | this study <sup>a</sup>                            | AJ868318                  | —                         |
|                            | Asteiidae     | <i>Asteia</i> sp.                            | this study <sup>a</sup>                            | AJ868319                  | —                         |
|                            | Sciomyzidae   | <i>Trypetoptera punctulata</i> (Scopoli)     | this study <sup>a</sup>                            | AJ868320                  | —                         |
|                            | Sepsidae      | <i>Orygma luctuosum</i> Meigen               | this study <sup>a</sup>                            | AJ868321                  | —                         |
|                            | Sepsidae      | <i>Sepsis thoracica</i> Robineau-Desvoidy    | G. Duvallet, personal communication                | AJ868322                  | —                         |
|                            | Coelopidae    | <i>Coelopa pilipes</i> Haliday               | M. Valero, personal communication <sup>a</sup>     | AJ865832                  | —                         |
|                            | Lauxanidae    | <i>Sapromyza</i> sp.                         | this study <sup>a</sup>                            | <b>AJ868323</b>           | —                         |
|                            | Lauxanidae    | <i>Prosopomyia pallida</i> Loew              | this study <sup>a</sup>                            | AJ868325                  | —                         |
|                            | Chamaemyiidae | <i>Chamaemyia</i> sp.                        | this study <sup>a</sup>                            | AJ868325                  | —                         |
|                            | Chyromyidae   | <i>Aphaniosoma</i> sp.                       | this study <sup>a</sup>                            | AJ868326                  | —                         |
|                            | Braulidae     | <i>Braula coeca</i> Nitzsch                  | Y. Layec, personal communication <sup>a</sup>      | AJ868327                  | —                         |
|                            | Tethinidae    | <i>Horaismoptera vulpina</i> Hendel          | this study <sup>a</sup>                            | AJ868328                  | —                         |
|                            | Milichiidae   | <i>Desmometopa</i> sp.                       | this study <sup>a</sup>                            | AJ868329                  | —                         |
|                            | Chloropidae   | unknown                                      | this study <sup>a</sup>                            | AJ868330                  | —                         |
|                            | Drosophilidae | <i>Chymomyza amoena</i> (Loew)               | R. Allemand, personal communication <sup>c</sup>   | <b>AJ868331</b>           | —                         |
|                            | Drosophilidae | <i>Zaprionus indianus</i> Gupta              | R. Allemand, personal communication <sup>c</sup>   | <b>AJ868332</b>           | —                         |
|                            | Drosophilidae | <i>Drosophila willistoni</i> Sturtevant      | R. Allemand, personal communication <sup>c</sup>   | <b>AJ868333</b>           | —                         |
|                            | Drosophilidae | <i>Drosophila subobscura</i> Collinin Gordon | R. Allemand, personal communication <sup>c</sup>   | <b>AJ868335</b>           | —                         |
|                            | Drosophilidae | <i>Drosophila hydei</i> Sturtevant           | R. Allemand, personal communication <sup>c</sup>   | <b>AJ868335</b>           | —                         |
|                            | Drosophilidae | <i>Drosophila simulans</i> Sturtevant        | R. Allemand, personal communication <sup>c</sup>   | <b>AJ868336</b>           | —                         |
|                            | Drosophilidae | <i>Drosophila immigrans</i> Sturtevant       | R. Allemand, personal communication <sup>c</sup>   | <b>AJ868337</b>           | —                         |
|                            | Drosophilidae | <i>Drosophila busckii</i> Coquillett         | R. Allemand, personal communication <sup>c</sup>   | <b>AJ868338</b>           | —                         |
|                            | Drosophilidae | <i>Drosophila funebris</i> (Fabricius)       | R. Allemand, personal communication <sup>c</sup>   | <b>AJ868339</b>           | —                         |
|                            | Drosophilidae | <i>Scaptomyza pallida</i> (Zetterstedt)      | R. Allemand, personal communication <sup>c</sup>   | <b>AJ868350</b>           | —                         |
|                            | Drosophilidae | <i>Scaptomyza</i> sp.                        | this study <sup>a</sup>                            | AJ868351                  | —                         |
|                            | Ephydriidae   | <i>Psilopa</i> sp.                           | this study <sup>a</sup>                            | AJ868352                  | —                         |
|                            | Ephydriidae   | <i>Scatella</i> sp.                          | this study <sup>a</sup>                            | AJ868353                  | —                         |
|                            | Ephydriidae   | <i>Hydrellia</i> sp.                         | this study <sup>a</sup>                            | AJ868355                  | —                         |
| Schizophora<br>Calyptratae | Anthomyiidae  | <i>Delia antiqua</i> (Meigen)                | S. Gouinguéné, personal communication <sup>b</sup> | AJ868355                  | —                         |
|                            | Muscidae      | <i>Atherigona soccata</i> Rondani            | this study <sup>a</sup>                            | <b>AJ868356</b>           | —                         |
|                            | Muscidae      | <i>Musca domestica</i> Linnaeus              | J. G. Scott, personal communication <sup>f</sup>   | <b>Q8MXC5<sup>g</sup></b> | —                         |
|                            | Muscidae      | <i>Musca vitripennis</i> Meigen              | G. Duvallet, personal communication                | <b>AJ868357</b>           | —                         |
|                            | Muscidae      | <i>Neomyia cornicina</i> (Fabricius)         | G. Duvallet, personal communication                | <b>AJ868358</b>           | —                         |
|                            | Muscidae      | <i>Coenosia</i> sp.                          | this study <sup>a</sup>                            | AJ868359                  | —                         |
|                            | Sarcophagidae | unknown                                      | this study <sup>a</sup>                            | AJ868350                  | —                         |
|                            | Calliphoridae | <i>Lucilia</i> sp.                           | A. Callaghan, personal communication               | <b>P91955<sup>h</sup></b> | —                         |
|                            | Calliphoridae | <i>Chrysomya albiceps</i> (Wiedemann)        | this study <sup>a</sup>                            | <b>AJ868351</b>           | —                         |

(Continued.)

| infraorder | family          | species                                        | reference                                        | accession<br><i>ace-2</i> | accession<br><i>ace-1</i> |
|------------|-----------------|------------------------------------------------|--------------------------------------------------|---------------------------|---------------------------|
|            | Glossinidae     | <i>Glossina fuscipes</i><br>Newstead           | P. Grébaut, personal<br>communication            | AJ868353                  | —                         |
|            | Nycteribiidae   | <i>Penicillidia conspicua</i> Speiser          | T. Disca, personal<br>communication <sup>a</sup> | AJ868352                  | —                         |
|            | Gasterophilidae | <i>Gasterophilus intestinalis</i><br>(De Geer) | A. Casteignau, personal<br>communication         | <b>AJ868355</b>           | —                         |

<sup>a</sup> Identification M. Martinez.

<sup>b</sup> Samples from Agroscope FAW, Wädenswil, Switzerland.

<sup>c</sup> Samples from FAO/IAEA Agriculture and Biotechnology Laboratory, Seibersdorf, Austria.

<sup>d</sup> Vontas *et al.* (2001).

<sup>e</sup> Samples from Université Cl. Bernard 1, Lyon, France.

<sup>f</sup> Samples from CS strain (Scott *et al.* 1996).

<sup>g</sup> Kozaki *et al.* (2001b).

<sup>h</sup> Accession of *Lucilia cuprina* (Chen *et al.* 2001).

## References

Chen, Z., Newcomb, R., Forbes, E., McKenzie, J. & Batterham, P. 2001 The acetylcholinesterase gene and organophosphorus resistance in the Australian sheep blowfly, *Lucilia cuprina*. *Insect Biochem. Mol. Biol.* **31**, 805–816. (doi:10.1016/S0965-1748(00)00186-7)

Kozaki, T., Shono, T., Tomita, T. & Kono, Y. 2001 Polymorphism in the acetylcholinesterase gene of the housefly *Musca domestica* L. (Diptera: Muscidae). *Appl. Entomol. Zool.* **36**, 377–380. (doi:10.1303/aez.2001.377)

Scott, J. G., Sridhar, P. & Liu, N. 1996 Adult specific expression and induction of cytochrome P450lpr in house flies. *Arch. Insect Biochem. Physiol.* **31**, 313–323. (doi:10.1002/(SICI)1520-6327(1996)31:3!313::AIDARCH6O3.0.CO;2-Y)

Vontas, J. G., Cosmidis, N., Loukas, M., Tsakas, S., Hejazi, M. J., Ayoutanti, A. & Hemingway, J. 2001 Altered acetylcholinesterase confers organophosphate resistance in the olive fruit fly *Bactrocera oleae*. *Pest. Biochem. Physiol.* **71**, 124–132. (doi:10.1006/pest.2001.2568)
